# Supplementary material for: Factors associated with falls in older adults with cancer: a validated model from the Cancer and Aging Research Group
Source: Springer Nature journal article supplement (doi:10.1007/s00520-018-4212-3), 2018-04-28
Supplement: MOESM1 [file 15726996]

| Supplementary Table. Model development | | | | | | | | |
| --- | --- | --- | --- | --- | --- | --- | --- | --- |
| Variable | Model 1 | Model 2 | Model 3 | Model 4 | Model 5 | Model 6 | Model 7 | Model 8 |
| Number of daily medications | Continuous | ≥4 | ≥5 | ≥4 | ≥5 | ≥4 | ≥4 | ≥4 |
| Creatinine clearance | Continuous | <30 | <30 | <40 | <40 | <30 | <30 | <30 |
| Any dependence in Instrumental activities of daily living | Yes vs no | Yes vs no | Yes vs no | Yes vs no | Yes vs no | Yes vs no | Yes vs no | Yes vs no |
| Timed Up and Go >13.5 seconds | Yes vs no | Yes vs no | Yes vs no | Yes vs no | Yes vs no | Yes vs no | Yes vs no | Yes vs no |
| HADS depression score ≥8 | Yes vs no | Yes vs no | Yes vs no | Yes vs no | Yes vs no | Yes vs no | Yes vs no | Yes vs no |
| SSRI use | Yes vs no | Yes vs no | Yes vs no | Yes vs no | Yes vs no | Yes vs no | Yes vs no | Yes vs no |
| Benzodiazepine use | Yes vs no | Yes vs no | Yes vs no | Yes vs no | Yes vs no | Yes vs no | Yes vs no | Yes vs no |
| Proton pump inhibitor us | Yes vs no | Yes vs no | Yes vs no | Yes vs no | Yes vs no | Yes vs no | Yes vs no | Yes vs no |
| “I feel like I am slowed down” | Yes vs no | Yes vs no | Yes vs no | Yes vs no | Yes vs no | Yes vs no | Yes vs no | Yes vs no |
| Age | - | - | - | - | - | ≥75 | - | ≥75 |
| Number of comorbidities | - | - | - | - | - | - | Continuous | Continuous |
| AIC | 334.9 | 335.3 | 335.2 | 333.3 | 333.4 | 335.6 | 336.4 | 336.9 |
| Residual | 314.9 | 315.3 | 313.2 | 313.3 | 313.4 | 313.6 | 314.4 | 312.9 |
| Fall rate cutoff | 16.8% | 21.9% | 17.7% | 18.4% | 16.3% | 16.8% | 22.9% | 17.8% |
| Sensitivity | 0.72 | 0.67 | 0.72 | 0.70 | 0.72 | 0.76 | 0.66 | 0.73 |
| Specificity | 0.68 | 0.72 | 0.69 | 0.68 | 0.67 | 0.60 | 0.75 | 0.64 |
| Positive Predictive Value | 0.33 | 0.29 | 0.33 | 0.32 | 0.32 | 0.29 | 0.36 | 0.31 |
| Negative Predictive Value | 0.92 | 0.91 | 0.92 | 0.91 | 0.92 | 0.92 | 0.91 | 0.92 |
| AUC (95% CI) | 0.73(0.67-0.80) | 0.72(0.65-0.78) | 0.73(0.66-0.80) | 0.73(0.66-0.80) | 0.73(0.66-0.80) | 0.72 (0.65-0.78) | 0.72 (0.65-0.79) | 0.72(0.65-0.79) |
| HADS, Hospital Anxiety and Depression Scale; SSRI, selective serotonin reuptake inhibitor; AIC, Akaike information criterion; AUC, area under the curve; CI, confidence interval. | | | | | | | | |
